# Supplementary material for: Preparing, optimising, and evaluating chitosan nanocapsules to improve the stability of anthocyanins from Aronia melanocarpa
Source: PubMed Central journal article supplement — RSC Adv. 2020 Dec 23;11(1):210–8. doi: 10.1039/d0ra08162k (PMC8690385; doi:10.1039/d0ra08162k), 2020-12-23
Supplement: RA-011-D0RA08162K-s001.pdf [file RA-011-D0RA08162K-s001.pdf]

## Supplementary Information

### Preparing, optimising, and evaluating chitosan nanocapsules to improve the stability of anthocyanins from *Aronia Melanocarpa*

Mingyue Wang<sup>a</sup>, Li Li<sup>a</sup>, Meizhi Wan<sup>a</sup>, Yang Lin<sup>b</sup>, Yuqi Tong<sup>a</sup>, Yanmin Cui<sup>a</sup>, Haotian Deng<sup>a</sup>, Chang Tan<sup>a</sup>, Yanwen Kong<sup>a</sup> and Xianjun Meng<sup>a,\*</sup>

<sup>a</sup> College of Food, Shenyang Agricultural University, Shenyang, Liaoning 110866, P. R. China

<sup>b</sup> Department of Food Science and Technology, Zhejiang University of Technology, Zhejiang, Hangzhou 310014, P.R. China

\* Author for correspondence

E-mail: [mengxjsy@126.com](mailto:mengxjsy@126.com)

Figure S1 HPLC chromatogram of anthocyanins after purification by RPLC.

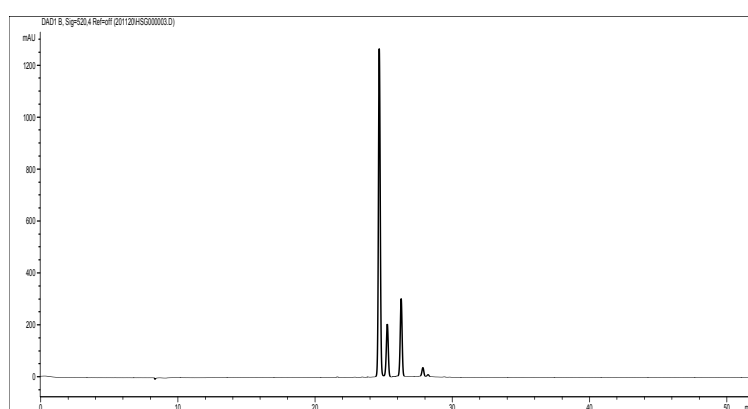

Table S1 Identification and quantification of anthocyanins purified after RPLC using HPLC–DAD–ESI–MS<sup>2</sup>.

| Anthocyanins             | Retention time (min) | Peak area | [M] <sub>1</sub> <sup>+</sup> (m/z) | [M] <sub>2</sub> <sup>+</sup> (m/z) |
|--------------------------|----------------------|-----------|-------------------------------------|-------------------------------------|
| cyanidin-3-O-galactoside | 24.667               | 11820.4   | 449                                 | 287                                 |
| cyanidin-3-O-glucoside   | 25.254               | 2077.6    | 449                                 | 287                                 |
| cyanidin-3-O-arabinoside | 26.264               | 2916.9    | 419                                 | 287                                 |
| cyanidin-3-O-xylose      | 27.846               | 381.4     | 419                                 | 287                                 |
